1 **Lifestyle and not density of fish hosts determines parasite distribution over time and**  
2 **space**

3 Nikol Kmentová<sup>1</sup>, Armando J. Cruz-Laufer<sup>1</sup>, Leona Milec<sup>1,2</sup>, Tanisha Moons<sup>1,3</sup>, Senne  
4 Heeren<sup>4,5</sup>, Elze van den Hoorn<sup>6</sup>, Kelly J. M. Thys<sup>1</sup>, Lawrence Makasa<sup>7</sup>, Auguste Chocha  
5 Manda<sup>8</sup>, Pascal Masilya Mulungula<sup>9</sup>, Maarten Van Steenberge<sup>1,10</sup>, Michiel W. P. Jorissen<sup>1</sup>,  
6 Maarten P. M. Vanhove<sup>1</sup>

7

8 <sup>1</sup> Hasselt University, Faculty of Sciences, Centre for Environmental Sciences, Research  
9 Group Zoology: Biodiversity and Toxicology, Agoralaan Gebouw D, 3590 Diepenbeek,  
10 Belgium.

11 <sup>2</sup> Faculty of Biosciences and Aquaculture, Nord University, Universitetsalléen 11, 8026,  
12 Bodø, Norway

13 <sup>3</sup> Department of Parasitology, Faculty of Science, University of South Bohemia, České  
14 Budějovice, Czech Republic

15 <sup>4</sup> Department of Biomedical Sciences, Institute of Tropical Medicine, 2000 Antwerp, Belgium

16 <sup>5</sup> Department of Microbiology, Immunology and Transplantation, Rega Institute for Medical  
17 Research, Katholieke Universiteit Leuven, 3000 Leuven Belgium

18 <sup>6</sup> HAS Green Academy, Applied Biology, Onderwijsboulevard 221, 5223 DE 's-  
19 Hertogenbosch

20 <sup>7</sup> Lake Tanganyika Research Unit, Department of Fisheries, Ministry of Fisheries and  
21 Livestock, P. O. Box 420055, Mpulungu, Zambia

22 <sup>8</sup> Unité de recherche en Biodiversité et Exploitation durable des Zones Humides (BEZHU),  
23 Faculté des Sciences Agronomiques, Université de Lubumbashi, Haut-Katanga, R.D. Congo

24 <sup>9</sup> Unité d'Enseignement et de Recherche en Hydrobiologie Appliquée (UERHA), Department  
25 of Biology, ISP-Bukavu

26 <sup>10</sup> Operational Directorate Taxonomy and Phylogeny, Royal Belgian Institute of Natural  
27 Sciences, Vautierstraat 29, B-1000 Brussels, Belgium

28 \*corresponding author: [nikol.kmentova@uhasselt.be](mailto:nikol.kmentova@uhasselt.be)

## 29 Abstract

- 30 1. Pelagic zones are characterised by consistent large-scale patterns of circulation on  
31 local and global scales. Lake Tanganyika, as an enclosed ecosystem provides a  
32 playing field to study evolutionary and ecological processes applicable to open water  
33 areas worldwide. Despite their important role in the ecosystem, large scale patterns  
34 of the distribution of parasites remain poorly understood. Monogenean parasites  
35 have been proposed as tags for ecosystem dynamics because of their direct life  
36 cycle and often high host specificity. We combined data on spatiotemporal dynamics  
37 of parasites (*Kapentagyryus*, Monogenea) with morphological variation of clupeid  
38 hosts to investigate general patterns of host-parasite interactions in the pelagic zone  
39 of this ancient lake.
- 40 2. Two dominant species of clupeid fishes in the pelagic zone of Lake Tanganyika are  
41 parasitised by two monogenean species of *Kapentagyryus* with different levels of host  
42 specificity. The host fishes are believed to perform lake-wide migrations driven by  
43 seasonal upwellings. To model spatiotemporal dynamics of host-parasite interaction,  
44 we used temporal data on monogenean infection along the North-South axis of Lake  
45 Tanganyika based on 1730 screened fishes and 3710 parasites together with  
46 phenotypic characterisation of the clupeid hosts.
- 47 3. Infection levels are dependent on host body size with contrasting trends in the two  
48 parasite species. We reveal temporal stability of infection with spatial distribution  
49 restricted by host life strategies. Spatial differences between the parasite species  
50 most likely reflect differences in migration between the host species; these are also  
51 reflected by morphological differences between some clupeid populations. Our  
52 results also suggest mutual facilitation of infection.
- 53 4. In conclusion, parasite infection is geographically restricted by host life strategies  
54 even in this ecosystem lacking physical barriers. Intensity of infection seems to be  
55 mainly driven by host size, with so far rarely reported mutual facilitation of co-  
56 infection. Temporal stability of infection in the pelagic zone contrasts with seasonal

57 changes in abundance of clupeid hosts. Overall, our results suggest that parasite  
58 infection dynamics in the open water areas are dependent on life style and not host  
59 density.

60

## 61 **Keywords**

62 Lake Tanganyika, parasitic flatworms, clupeids, migration, population dynamics

63

## 64 **Introduction**

65

### 66 *Trophic and host-parasite interactions in pelagic systems*

67 The pelagic zone, also known as the open water area, represents 99% of the volume of the  
68 biosphere. Pelagic zones are characterised by large-scale patterns of circulation and  
69 upwelling processes (Corman et al., 2010) that support the majority of the biomass targeted  
70 by fisheries (Pauly et al., 2002). Species aggregation is common at all trophic levels and is  
71 driven by the patchiness of primary production (Legendre & Le Fèvre, 1991; Ritz et al.,  
72 2011). Migration is a common strategy of pelagic species to cope with seasonal variation of  
73 resources at both small and large geographic scales (Angel, 1993). Small pelagic fishes  
74 (clupeids, mackerels) are known for their schooling behaviour and large distribution ranges  
75 often linked to their long-distance migrations (Teske et al., 2021). Therefore, small pelagic  
76 fishes have been proposed as indicator taxa for ecosystem changes related to e.g., climate  
77 change and overfishing. However, long-distance migration and population dynamics of small  
78 pelagic fish species are challenging to study, due to their high mobility and fragility that  
79 restrict traditional tracking methods.

80 Metazoan parasites encompass a high proportion of global species diversity (Poulin, 2014;  
81 Windsor, 1998). Despite a largely negative perception, parasites have been recognised as  
82 ecosystem engineers that form substantial biomass in aquatic ecosystems (Kuris et al.,  
83 2008) and alter food web topography, including competition and predation, through their  
84 indirect effect on host abundance (Hatcher et al., 2012). They contribute to ecosystem

85 energy transfer between trophic levels (Lafferty et al., 2006), e.g. parasites may induce  
86 changes in host behaviour that influence predation (Lefèvre et al., 2009), or act as mediators  
87 in biological invasions (Blackburn et al., 2011). However, the predictability of parasite  
88 communities at ecological timescales is often questioned as there is a lack of common  
89 patterns found in open water areas and in host species with large distribution ranges (Timi &  
90 Poulin, 2003).

91 Pelagic fish hosts are often considered as parasite species-poor compared to littoral host  
92 communities (Marcogliese, 2002). Although the community structures of parasites have  
93 been assessed in the context of biological tags of their hosts, including in pelagic marine  
94 areas (reviewed in MacKenzie & Abaunza, (2014)), determinants structuring population-level  
95 infection dynamics in pelagic environments are scarce.

96

#### 97 *Lake Tanganyika and its pelagic zone*

98 Lake Tanganyika (LT) has been proposed as a natural study system for general principles of  
99 evolution due to its high species diversity and endemism of various taxa (Coulter, 1991a;  
100 Cristescu et al., 2010). While Lake Tanganyika has all typical characteristics of a pelagic  
101 environment (vertical stratification, seasonal upwellings, simple trophic structure), it also has  
102 clear geographical boundaries and a species-poor pelagic community compared to marine  
103 environments, offering simplified conditions to study pelagic ecosystem dynamics (Paugy &  
104 Lévêque, 2017). It is dominated by two species of clupeid fishes which make up the majority  
105 of fish biomass and are the main source of fisheries production in the four riparian countries  
106 of the lake (Mannini et al., 1996). Despite the difficulty of tagging and effectively tracking  
107 fragile small pelagic species, lake-scale latitudinal migrations of the endemic Tanganyika  
108 clupeids, *Limnothrissa miodon* (Boulenger, 1906) and *Stolothrissa tanganyicae* Regan, 1917  
109 have been monitored through indirect methods, such as determining the difference in size  
110 and abundance in relation to the season and geographic origin along the lake (Mulimbwa  
111 N'Sibula et al., 2022; Plisnier et al., 2009). Fisheries production across landing sites varies  
112 substantially, indicating seasonal migrations of the Tanganyika clupeids. These patterns

113 have been linked to predator avoidance and food-seeking behaviour (Plisnier et al., 2009).  
114 Recent genomic studies of the Tanganyika clupeids find only a weak signal of isolation by  
115 distance and no clear stock structure along the North-South axis of the lake (De Keyzer et  
116 al., 2019; Junker et al., 2020).  
117 Clupeid fishes in Lake Tanganyika are parasitised by two gill-infecting species of  
118 *Kapentagyris* Kmentová, Vanhove & Gelnar, 2018 (Kmentová et al., 2018). *Kapentagyris* is  
119 a lineage of monogenean flatworms (Monogenea, Dactylogyridae) that has so far only been  
120 reported from African freshwater clupeid hosts (Vanhove et al., 2021). Monogenean  
121 flatworms are obligate parasites of mainly fishes, some of which include pelagic hosts  
122 (Kmentová et al., 2018; Plaksina et al., 2021; Van Der Lingen et al., 2015). Given their short  
123 generation time, high substitution rate and host dependency, obligate parasites can serve as  
124 a magnifying glass of host population dynamics (Catalano et al., 2014; Geraerts et al.,  
125 2022). The patterns driving the spatiotemporal distribution of directly transmitted parasites  
126 such as monogenean flatworms may be informative for pelagic ecosystem dynamics as  
127 mediators between the external environment and the hosts. Due to their single-host life cycle  
128 and specificity for pelagic hosts, species of *Kapentagyris* in Lake Tanganyika are proposed  
129 as tags for host distribution in the pelagic zone and the dynamics of pelagic ecosystems  
130 (Kmentová et al., 2019; Schoeman et al., 2022).

131

### 132 *Spatiotemporal dynamics in the pelagic zone - a holistic approach*

133 Spatiotemporal dynamics of parasites have been studied mainly in the context of host-driven  
134 determinants of their community composition (reviewed in Lester & MacKenzie, (2009)).  
135 Large-scale population dynamics of parasites infecting pelagic organisms are hardly ever  
136 studied due to the considerable effort required to sample fish hosts along their long-distance  
137 migrations. To date, determinants of population connectivity of parasitic flatworms over large  
138 geographic distances remains to be elucidated (Poulin, 2007). The population structure of  
139 our study species, *K. limnotrissae* (infecting *L. miodon*) and *K. tanganicanus* (infecting both  
140 clupeid species), has previously been analysed over the entire geographic range of the lake,

141 including temporal and seasonal sampling. Following the pattern of their clupeid hosts, no  
142 clear differentiation across the North-South axis of LT was found (Kmentová et al., 2020). To  
143 study the ecosystem dynamics in the pelagic zone, surveys of pelagic fishes have been  
144 combined with analyses of their morphological variation (Muniz et al., 2020; Valentin et al.,  
145 2014), otolith composition (Javor et al., 2011) and, more recently, population genomics  
146 (Baltazar-Soares et al., 2018; De Keyzer et al., 2019; Junker et al., 2020). This holistic  
147 approach has been proposed not only to study spatiotemporal dynamics in the pelagic zone  
148 (Abaunza et al., 2008; Kerr et al., 2017), but also other aquatic ecosystems such as large  
149 rivers (Lavoué et al., 2008).

150

151 In this study, we investigate the spatiotemporal dynamics of parasites alongside the  
152 morphology of their clupeid hosts as a flag taxon for the pelagic zone worldwide. We  
153 combine geographical and seasonal results on parasite infection, and morphology of the  
154 targeted fish hosts with previously published knowledge on the biology and genetic  
155 population structure of monogenean parasites infecting clupeids, fishery statistics, seasonal  
156 and annual cycles in primary productivity and upwelling (schematic representation of study  
157 design presented in Fig. 1).

158

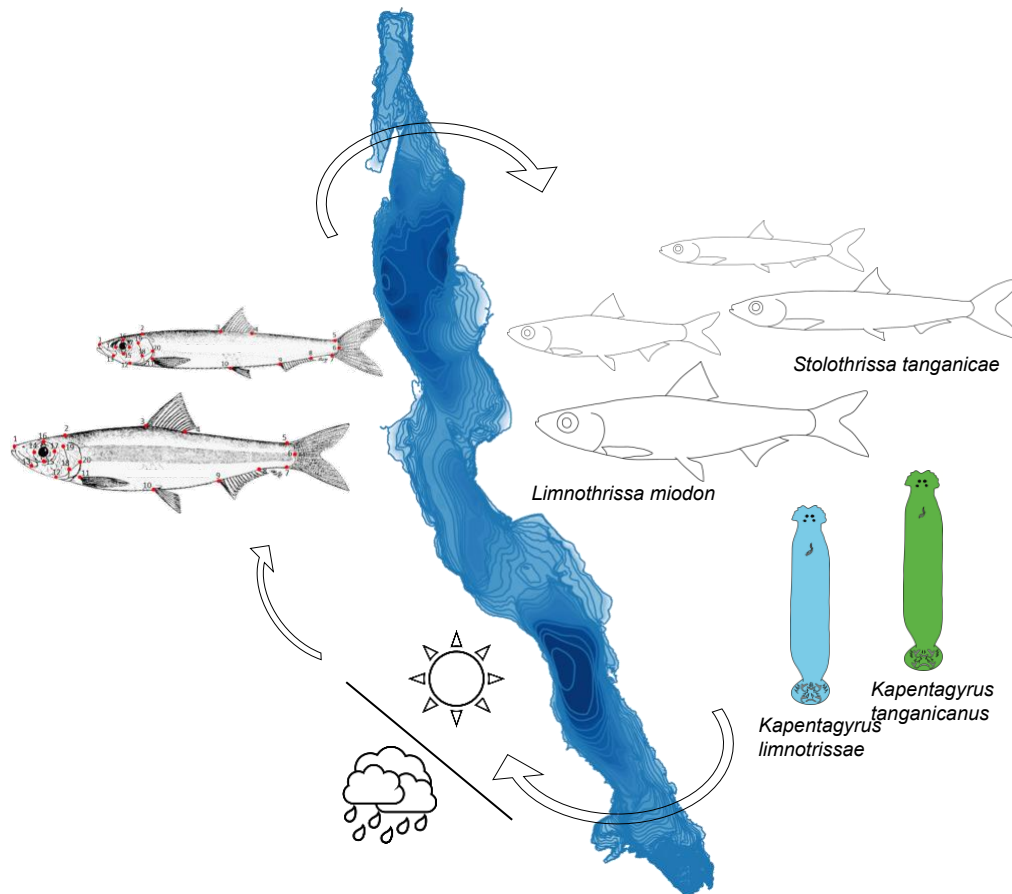

159  
160 Fig. 1: Schematic visualisation of the study system of monogenean parasites infecting  
161 clupeid fishes in Lake Tanganyika.

162  
163 We hypothesise that 1) given the suggested high level of North-South mobility of clupeid  
164 fishes in Lake Tanganyika (Plisnier et al., 2009; De Keyzer et al., 2019; Junker et al., 2020),  
165 the population infection dynamics of *Kapentagyrus* spp. are not related to the spatiotemporal  
166 origins, 2) given the contrasting host range between the two species of *Kapentagyrus* and  
167 the differences in lifestyle between the host species, spatial differences in infection will be  
168 more pronounced in *K. limnotrissae*, and 3) following previously published results on  
169 contrasting introduction success in different host life stages (Kmentová et al., 2019), we  
170 expect host size-driven differential occurrence of *Kapentagyrus* spp. on *L. miodon*.

171

## 172 Methodology

173

174 *Sample collection and species identification*

175 In total, 1730 specimens of two endemic pelagic clupeid species, *L. miodon* (733) and *S.*  
176 *tanganicae* (997), were collected along the North-South axis of Lake Tanganyika, including  
177 all three subbasins (North, Central, and South) in two different seasons (rainy season from  
178 October to April and dry season from May to September) within a four-year period (Fig. 2,  
179 Table S1). Freshly caught fish specimens were either obtained in collaboration with the  
180 experimental fishing unit of the Centre de Recherche en Hydrobiologie - Uvira (CRH) (Uvira,  
181 Democratic Republic of the Congo) or purchased from local fishermen. We combine newly  
182 obtained data on monogenean infection of clupeids in LT with those published in previous  
183 studies (Kmentová et al., 2020, 2018). Host specimens were collected within a period of 2  
184 weeks (August 2016, April 2018, and October 2019) to avoid sampling the same population  
185 twice, because both clupeid species are highly mobile (De Keyzer et al., 2019; Mulimbwa  
186 N'Sibula & Mannini, 1993). Whole fish and/or gills were preserved in absolute ethanol. Host  
187 specimens were examined for the presence of monogenean parasites according to the  
188 procedure described in Kmentová et al. (2018). Species level identification of *Kapentagyrus*  
189 spp. was based on distinctive characters of the hard parts of the attachment organ in the  
190 posterior part of their bodies (for more details see Kmentová et al., (2018)). In the case of *L.*  
191 *miodon*, the only species of the two clupeids that hosts two monogenean species,  
192 monogenean individuals that could not be identified at the species level were only included  
193 in the counts of total infection intensities.



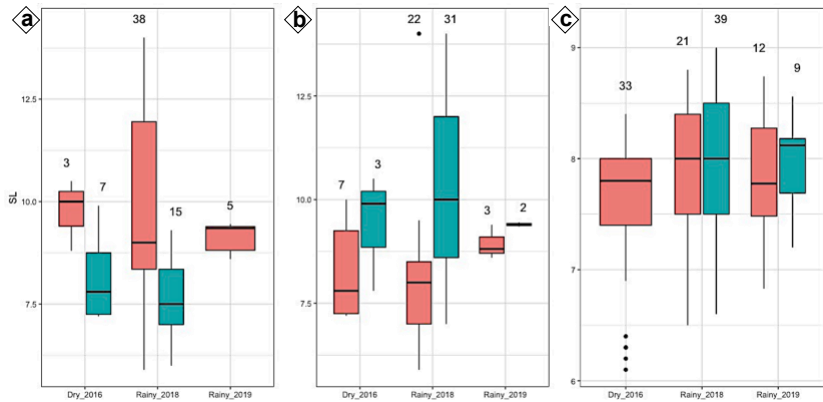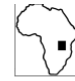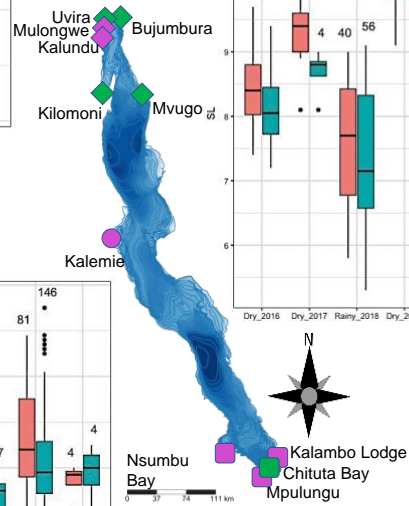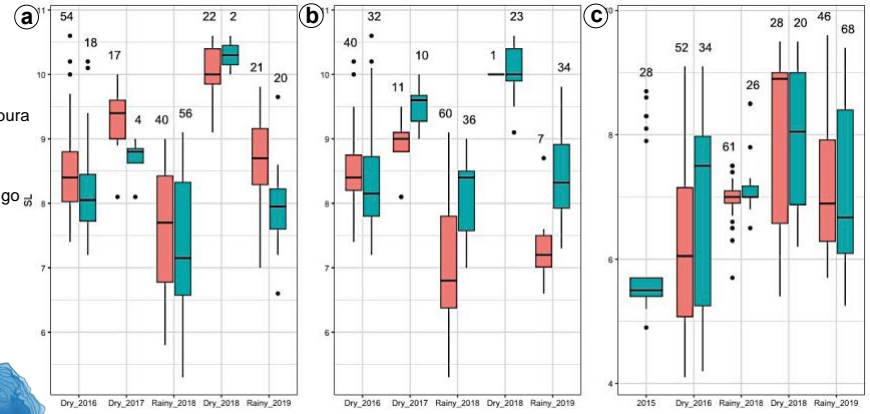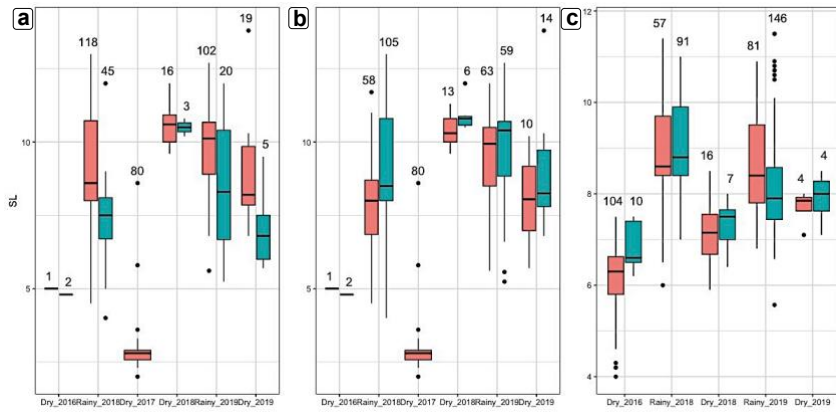

Fig. 2: Overview of screened fish hosts and incidence of infection of collected parasite populations. Season and year of origin (x-axis) and standard length of the fish host (y-axis, SL in cm) of a) *Kapentagyris limnotrissae* ex *Limnothrissa miodon*, b) *Kapentagyris tanganicus* ex *Limnothrissa miodon*, c) *Kapentagyris tanganicus* ex *Stolothrissa tanganicus*. Infected fishes are depicted in blue, non-infected in red. The total number of fish screened at a certain time point is mentioned above each of the boxplots. Subbasin division is visible by different shapes used for sampling localities with diamonds representing northern subbasin, a circle representing central subbasin and squares representing southern subbasin. The purple colour indicates the sampling localities of fish specimens used in the geomorphometric analyses.

### *Parasite population dynamics*

To investigate the host parameters that might influence infection levels, the dataset was divided into three host-parasite combinations according to host species (i: *K. limnotrissae* ex *L. miodon*, ii: *K. tanganicus* ex *L. miodon*, iii: *K. tanganicus* ex *S. tanganicus*). We modelled the infection intensity per host specimen against a range of other parameters, including sampling location (as subbasin - North, Central, South), season (dry period from May to September, rainy period from October to April), and host size (standard length) as explanatory variables (Table 1) as well as infection levels of the respective other parasite species if applicable, i.e. *K. tanganicus* in (i) and *K. limnotrissae* in (ii). Because of seasonal migration and previous records on spatiotemporal variation in body size (Plisnier et al., 2009), we expect an interaction of host size with locality and season, respectively. Several studies also suggested that infection levels of monogeneans are related to fish size (Akoll et al., 2012; Šimková et al., 2004). Therefore, we included interaction effects between host size and the remaining parameters in the initial models. Infection parameters of parasites often present a substantial amount of zero counts (Lester, 2012; Tinsley et al., 2020). Therefore, we fitted infection levels using zero-inflated models (ZIMs) with a Poisson probability distribution that assume that the excess of zero counts is

produced by a separate process. In the present case, we hypothesised that the excess of zero counts result from a lack of contact with parasites in some specimens, while true zeros arise from host resistance (Wang, et al., 2017; Zuur et al., 2009). We fitted generalised linear models without zero-inflation to test whether these assumptions are true. The present datasets are overdispersed (residual deviance/residual degrees-of-freedom > 1.5 for a Poisson distribution). To address this overdispersion, we used a negative binomial probability distribution. Finally, host specimens most likely represent non-independent samples, as fishes belonging to the same schools may have experienced more similar parasite exposure scenarios. Therefore, we also tested whether including the sampling day and locality as random effects in a mixed model further improved the model fit. To avoid overfitting, we simplified models through a backwards elimination procedure using the function *drop1* including a  $\chi^2$  test. All effects that failed to significantly improve model fit were removed, starting from the interaction effects.

All model-based analyses were carried out in R v4.1.2 (R Core Team, 2022). Models were fitted using the package *glmmTMB* v1.1.2.3 (Brooks et al., 2017). The package *glmmTMB* offers models with two options for negative binomial distributions (options *nbinom1* and *nbinom2*) that implement linear and quadratic parameterisation, respectively (see Hardin & Hilbe, (2007)). Both options were tested here. We compared model fits using the Akaike information criterion (AIC) through the function *AICtab* in the package *bbmle* v1.0.24 (Bolker, 2017). We also checked model fits through quantile-quantile plots and residual vs. fitted plots as provided by the package *DHARMA* v0.4.5 (Hartig, 2017).

Based on the best-fitting model, we predicted infection levels for all three host-parasite combinations as a function of the subbasin and season, as well as the continuous variables the hosts' standard length and the level of co-infections through the package *emmeans* (Lenth, 2022). The resulting figures were plotted through the packages *emmeans* and *ggplot2* (Wickham, 2016).

*Geomorphometrics of clupeid hosts*

We expect host phenotype to be potentially linked to different environmental conditions in the subbasins. Therefore, the two host species were examined to investigate the potential link between the morphological variation and geographic origin of host specimens. In addition to classical morphological assessment, the evaluation of body shape variation can be quantified via geomorphometrics (Elewa, 2004). Specimens collected from six different localities along the lake shoreline within two weeks in October 2019 were selected (Fig. 2 and Table S1). Photographs were taken using Canon 4000D reflex camera equipped with an EF-S 18-55 mm III-lens, set on 55 mm for a total of 224 specimens of *S. tanganyicae* and 195 specimens of *L. miodon*. The body shape of each specimen was captured by a set of 20 fixed landmarks. Landmarks are reference points of coordinates in 2D or 3D (2D for this study), and contain essential information on size, shape and scale (Elewa, 2004; Savriama, 2018). They were set using the *tpsDig2* software v2.31 (Rohlf, 2018) using a *tps* file created with the *tpsUtil* software v1.78 (Rohlf, 2018). The landmarks were defined based on previous studies conducted with other species of clupeids (De La Cruz Agüero & Rodríguez, 2004; Mounir, Ewague, Znari, & Elmghazli, 2019; Silva, 2003), see Fig. 3.

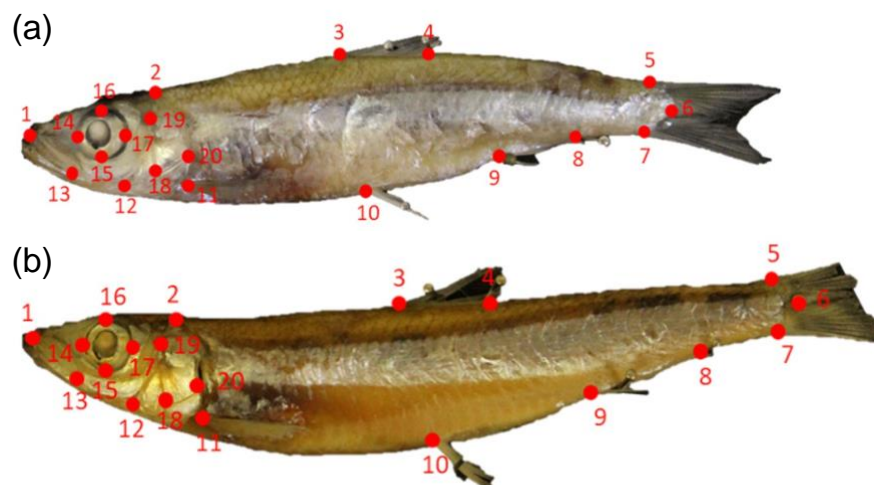

Fig. 3: Position of landmarks recovered for 2D digitisation of specimen of a) *Limnothrissa miodon* and b) *Stolothrissa tanganyicae*.

Morphological variation within the two clupeid species was analysed with *MorphoJ* v2 (Klingenberg, 2011). We made a distinction between analyses based on whole-body landmarks vs. head-only landmarks. For the analyses of the whole body, we used all obtained landmarks, for the head-only analyses, landmarks 1, 2 and 11-20 were included. To extract the shape information, full Procrustes fits of landmark data were performed and aligned by longitudinal axes of the specimens. Three classifiers (species, locality of origin, and subbasin) were imported for further analyses. Principal Component Analysis (PCA) was performed on the covariance matrix to visualise the shape variation. Highly deviating specimens, identified by the PCA plot, were excluded from the analysis. Regressions against the standard length (measured separately from each specimen) of each specimen followed by a 10,000 replicate permutation test were performed on the first three individual PC axes. Due to the significant correlation between the standard length and PCA loadings/Procrustes distances (see Figs. S1 & S2), the final PCAs were performed on residuals which resulted from the regression analyses of Procrustes distances and standard length. Canonical Variate Analyses (CVA) on the residuals (see above) and permutation tests of 10,000 replicates, were performed to test for differences in morphology between specimens from different sites of origin or subbasins. The resulting figures were plotted through the *R* packages *ggplot2* (Wickham, 2016), *RColorBrewer* (Neuwirt, 2022), *ggtext* (Wilke, 2020) and *tidyverse* (Wickham et al., 2019).

## Results

### Parasite population dynamics

For all three datasets (i–iii), a zero-inflated negative binomial mixed model resulted in the best fit (Table 1). In any case, seasonality failed to significantly improve model fit. Therefore, both the parameter and its interaction with the standard length were removed from all models.

For *K. tanganicus* (i and iii), a monogenean infecting both species of clupeids, the models with a quadratic parameterisation (*nbinom2*) outperformed the models with a linear parameterisation. *Kapentagyris limnotrissae* infecting *L. miodon* (ii), only improved the model fit marginally ( $\Delta\text{AIC} = 2$ ;  $\chi^2(1, 2) = 2310$ ,  $p = 0.038$ ). In the post-hoc analysis, we found only minor differences between infection levels of *K. tanganicus* (Figs. 4&5), yet subbasin identity contributed significantly to the overall model fit (Table 1). Infection intensities of *K. tanganicus* increased with host size (Figs. 4&5) and with co-infection numbers of *K. limnotrissae* (Fig. 6). For *L. miodon*, this increase was generally weaker in the southern subbasin and particularly strong in the North. The host standard length had a significant interaction with the subbasin. For *S. tanganicae*, only the standard lengths of the hosts were a determinant of infection intensity. For *K. limnotrissae* (ii), the models with a linear parameterisation (*nbinom1*) outperformed those with a quadratic parameterisation. The interaction effect of subbasin with the standard length did not improve model fit and was, therefore, removed. The three minimal adequate models can be found in Table 1. Infection levels in the South of Lake Tanganyika were significantly lower than in other subbasins (Fig. 6). Infections significantly decreased with host standard length and increased with co-infection numbers of *K. tanganicus* (Fig. 6).

- 1 Table 1: Stepwise backwards selection of effects (step 1 and 2) in generalised linear (mixed) models for each and host-parasite combination.
- 2 Models with the lowest values of the AIC (minimal adequate models) are highlighted in bold.

|                 |                   | <i>K. tanganicanus</i> ex <i>L. miodon</i> (i) |                      |             | <i>K. limnotrissae</i> ex <i>L. miodon</i> (ii) |                            |             | <i>K. tanganicanus</i> ex <i>S. tanganicae</i> (iii) |                            |                      |
|-----------------|-------------------|------------------------------------------------|----------------------|-------------|-------------------------------------------------|----------------------------|-------------|------------------------------------------------------|----------------------------|----------------------|
|                 |                   | full model                                     | step 1               | step 2      | full model                                      | step 1                     | step2       | full model                                           | step 1                     | step2                |
| <b>Zeroinfl</b> | Mixed effects     |                                                | -ii:SL-<br>Season:SL | -Season     |                                                 | -Subbasin:SL-<br>Season:SL | -Season     |                                                      | -Season:SL-<br>Subbasin:SL | -Subbasin-<br>Season |
| <b>Poisson</b>  |                   | 3714                                           | 3770                 | 3899        | 1999                                            | 2011                       | 2012        | 2368                                                 | 2367                       | 2366                 |
| <b>NBinom1</b>  |                   | 2585                                           | 2582                 | 2610        | 1579                                            | 1615                       | 1646        | 2053                                                 | 2048                       | 2067                 |
| <b>NBinom2</b>  |                   | 2506                                           | 2504                 | 2525        | 1638                                            | 1677                       | 1693        | 2096                                                 | 2094                       | 2098                 |
| <b>Poisson</b>  | locality,<br>date | 3078                                           | NA                   | 2970        | 1856                                            | NA                         | NA          | 2101                                                 | 2113                       | 2107                 |
| <b>NBinom1</b>  | locality,<br>date | 2487                                           | 2484                 | 2484        | 1564                                            | 1560                       | <b>1560</b> | 1990                                                 | 1986                       | 1981                 |
| <b>NBinom2</b>  | locality,<br>date | 2429                                           | 2427                 | <b>2425</b> | 1591                                            | 1591                       | 1589        | 1981                                                 | 1981                       | <b>1975</b>          |

- 3 Abbreviations: standard length (SL), zero inflated model (Zeroinfl), negative binomial distribution (NBinom1,2), Poisson distribution (Poisson).

4

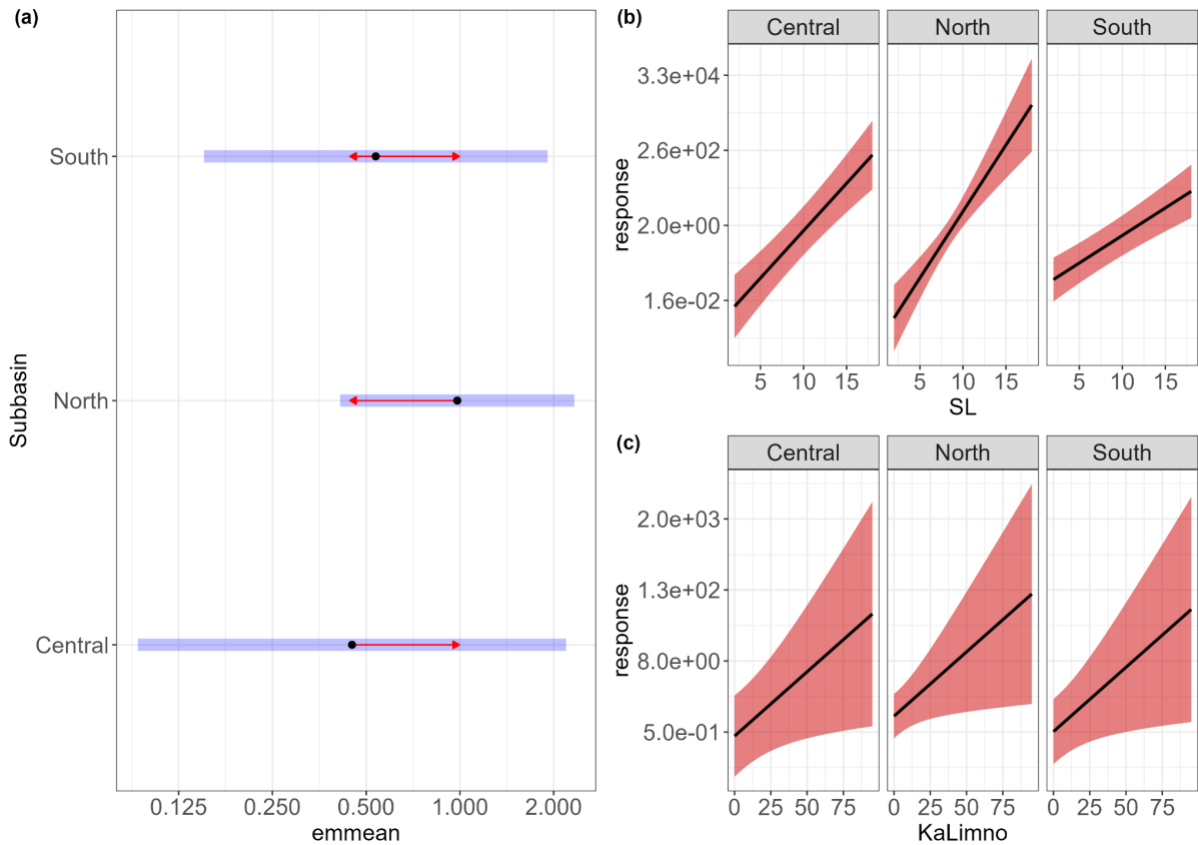

5

6 Fig. 4: Predictions for infection intensity of *Kapentagyrus tanganicus* ex *Limnothrissa*

7 *miodon* with 95% confidence intervals under the minimal adequate model (Table 1). a)

8 Infection intensity in different subbasins showed no significant differences (CIs in blue,

9 direction of overlap in red) with estimated marginal means on the x-axis, b) Infection intensity

10 increased with standard length (SL) of the host, c) Infection intensity increased with higher

11 infection intensities of *Kapentagyrus limnotrissae*.

12

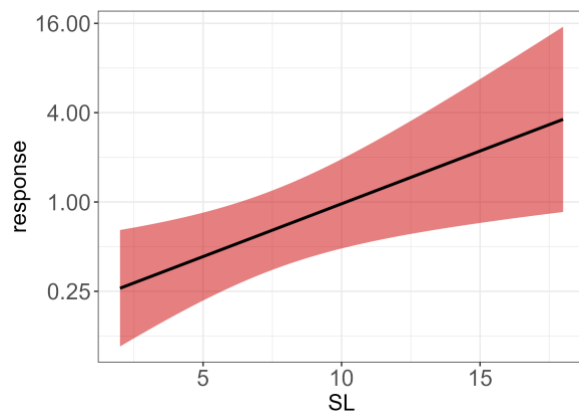

13

14 Fig. 5: Prediction of infection intensity of *Kapentagyrus tanganicus* ex *Stolothrissa*

15 *tanganae*. The infection intensity increased with the standard length (SL) of the host.



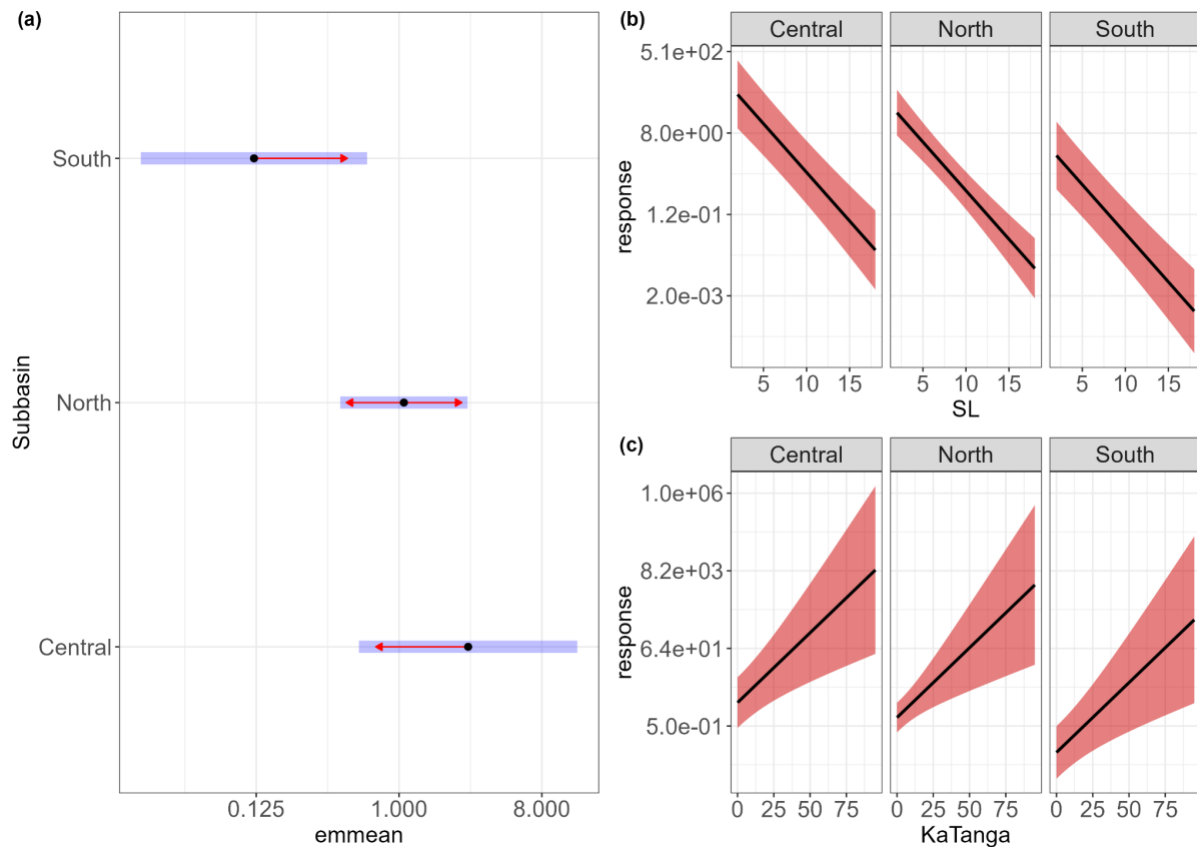

16  
17 Fig. 6: Predictions for infection intensity of *Kapentagyrus limnotrissae ex Limnothrissa*  
18 *miodon*. a) Infection intensity related to subbasin origin with the confidence interval (in blue)  
19 and direction of overlap (in red) with estimated marginal means on the x-axis, b) Infection  
20 intensity as a function of the standard length (SL) of the host, c) Infection intensity as  
21 function of co-infection by *Kapentagyrus tanganicanus*.

22

### 23 **Geomorphometrics of clupeid hosts**

24 Geomorphometric analyses revealed strong similarity of head morphology between  
25 specimens from different localities and subbasins of the lake in both clupeid species. In the  
26 case of *L. miodon*, the first three PC axes explained 22.1%, 17.1% and 12.3% of the  
27 variation, respectively (see Fig. 7A&B), with visible North-South gradient mainly along the  
28 PC2. In case of *S. tanganicae*, the first three PC axes explained 24.2%, 18.1% and 11.8% of  
29 the variation, respectively (see Fig. 7C&D), with no visible structuring according to locality of  
30 origin. As wireframes displayed variation in the positioning of the full body, most likely related  
31 to the preservation of specimens, results based on the whole-body shape are presented in

32 the supplementary information only and should be interpreted with caution (Figs. S1&2).  
33 Based on the wireframes of the head shape (Fig. 8), differences in the relative position of the  
34 snout, eye and operculum are visible along the displayed PC axes.  
35  
36 The results of our CVAs confirmed the trend visible mainly along the second PC axis with  
37 significant differences in the shape of the whole body and head related to the geographic  
38 origin of *L. miodon* (Tables 2 and S1). Specifically, head shape differences increased with  
39 geographic distance in *L. miodon*. Although the CVAs indicated significant shape differences  
40 between some of the localities in both the full body and head datasets of *S. tanganycae* (see  
41 Tables 2 and S1), no consistent geographical pattern was detected in the PCAs. In both  
42 species, differences in the head shape were more pronounced in relation to geographic  
43 origin compared to the full body.  
44

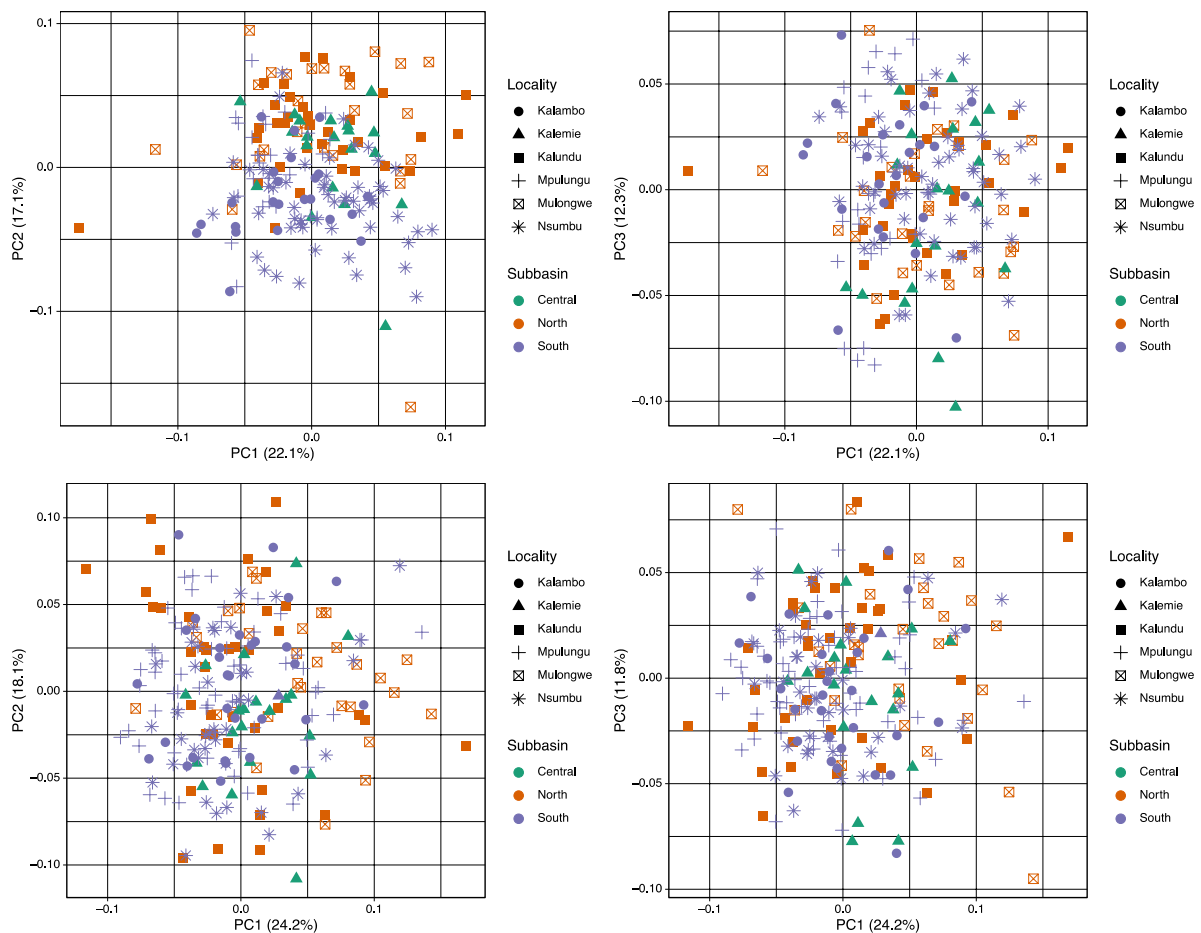

45

46 Fig. 7: Biplots of Principal Component Analyses (PCA) showing the shape variation in the  
47 head across the sampled localities of a) *Limnothrissa miodon*, first two PCs displayed, b)  
48 *Limnothrissa miodon*, first and third PCs displayed, c) *Stolothrissa tanganyicae*, first two PCs  
49 displayed, d) *Stolothrissa tanganyicae*, first and third PCs displayed.

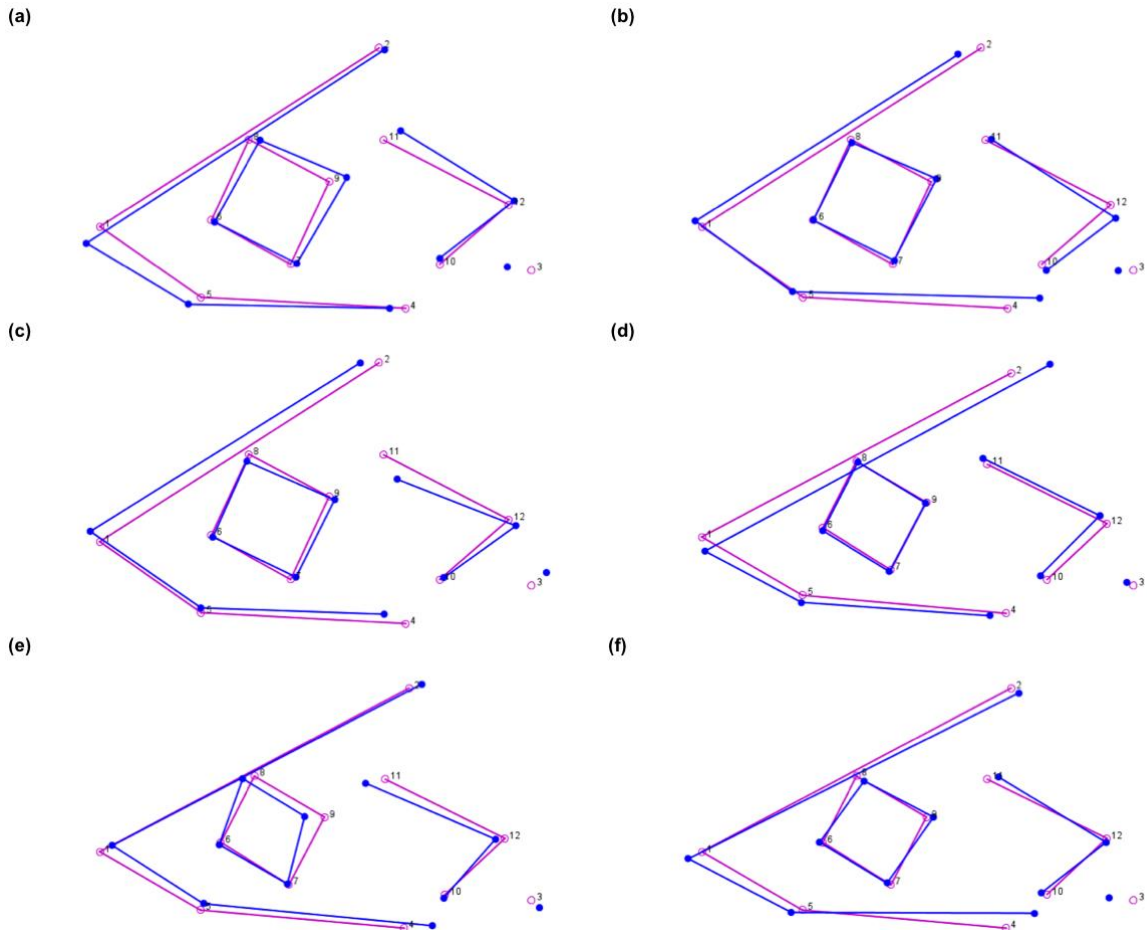

50  
51 Fig. 8: Wireframes showing the shape variation in the head based on the coordinates of  
52 Principal Component Analyses of a) *Limnothrissa miodon*, PC1, b) *Limnothrissa miodon*,  
53 PC2, c) *Limnothrissa miodon*, PC3, d) *Stolothrissa tanganyicae*, PC1, e) *Stolothrissa*  
54 *tanganyicae*, PC2, f) *Stolothrissa tanganyicae*, PC3. The target shape is presented in blue, the  
55 starting shape in pink.

56  
57  
58  
59  
60

61 Table 2: Results of Canonical Variate Analyses of head shape variation for a) *Limnothrissa*  
 62 *miodon* b) *Stolothrissa tanganicae*. Values of Procrustes distances are displayed below the  
 63 diagonal, P-values are shown above the diagonal. Significant P-values (<0.05) are indicated  
 64 in bold. Number of samples are indicated between brackets behind the locality names with  
 65 designation of the subbasin, N – North, C – Central, S – South).

| (a)          | Mulongwe (28) | Kalundu (34)  | Kalemie (20)  | Mpulungu (27)    | Nsumbu (58)      | Kalambo (23)  |
|--------------|---------------|---------------|---------------|------------------|------------------|---------------|
| Mulongwe (N) | x             | 0.3842        | <b>0.0207</b> | <b>0.0002</b>    | <b>0.0466</b>    | <b>0.0001</b> |
| Kalundu (N)  | 0.0252        | x             | <b>0.0029</b> | <b>0.0002</b>    | <b>0.0376</b>    | <b>0.0001</b> |
| Kalemie (C)  | 0.0447        | 0.0423        | x             | <b>&lt;.0001</b> | <b>0.0355</b>    | <b>0.0005</b> |
| Mpulungu (S) | 0.0519        | 0.0472        | 0.0550        | x                | <b>0.0027</b>    | 0.2593        |
| Nsumbu (S)   | 0.0298        | 0.0263        | 0.0308        | 0.0340           | x                | <b>0.0008</b> |
| Kalambo (S)  | 0.0603        | 0.0536        | 0.0489        | 0.0264           | 0.0379           | x             |
| (b)          | Mulongwe (30) | Kalundu (38)  | Kalemie (21)  | Mpulungu (64)    | Nsumbu (40)      | Kalambo (30)  |
| Mulongwe (N) | x             | <b>0.0060</b> | 0.0570        | <b>0.0029</b>    | <b>&lt;.0001</b> | <b>0.0014</b> |
| Kalundu (N)  | 0.0479        | x             | 0.0651        | 0.5339           | 0.0321           | 0.1954        |
| Kalemie (C)  | 0.0387        | 0.0401        | x             | <b>0.0191</b>    | <b>0.0116</b>    | <b>0.0336</b> |
| Mpulungu (S) | 0.0382        | 0.0188        | 0.0336        | x                | <b>0.0196</b>    | 0.3979        |
| Nsumbu (S)   | 0.0584        | 0.0339        | 0.0368        | 0.0270           | x                | 0.0785        |
| Kalambo (S)  | 0.0467        | 0.0301        | 0.0353        | 0.0189           | 0.0274           | x             |

66

## 67 Discussion

### 68 *Temporal stability and spatial differences of infection*

69 Previous studies indicate that the distribution of aquatic parasites is determined by  
 70 environmental factors (Timi & Poulin, 2003). Also, many parasites are vulnerable to  
 71 extinction, as a decline in population size of the host can negatively affect the often-  
 72 overdispersed distribution of parasite populations (Lester, 2012). In Lake Tanganyika,  
 73 annual differences in fisheries production are believed to be caused by natural cycles of  
 74 clupeid species. This is visible in density changes of fish populations over a spatiotemporal  
 75 gradient (Mölsä et al., 1999; Plisnier et al., 2009). Additionally, seasonal fluctuations in  
 76 clupeid catches in Lake Tanganyika are driven by external factors related to the  
 77 hydrodynamics and the weather. Despite the reported North-South clupeid migrations  
 78 resulting in seasonal fluctuations of host population densities and mean size distribution of

79 the hosts (Kimirei & Mgaya, 2007; Mulimbwa N'Sibula et al., 2022), in line with our  
80 hypothesis we found the spatiotemporal dynamics of *Kapentagyryus* spp. in the pelagic zone  
81 to be seasonally independent. This result confirms previously suggested independence on  
82 seasonal host population cycles of rather short-lived parasites (Lester & MacKenzie, 2009)  
83 of which monogeneans in the tropical areas with an estimated generation time of days up to  
84 a few weeks might be considered (Tomnatik, 1990). Alternatively, host fluctuations could  
85 appear over longer cycles that were not covered by the sampling design of our study. While  
86 we could not disentangle the effects of host size and geographic origin for *K. tanganicanus*,  
87 *K. limnotrissae* exhibited a slight spatial differentiation along the North-South axis. We  
88 suggest that this pattern is driven by temporal residency and patchy distribution of *L. miodon*  
89 in the littoral habitat before reaching a certain size and becoming pelagic. In general, the  
90 geographic distribution of parasites infecting pelagic fish hosts is linked to life cycle  
91 complexity (number of host species with different distribution ranges) with limited spatial  
92 distribution of monogeneans only to certain areas, as in the case of *Sprattus sprattus* L.  
93 (Kleinertz et al., 2012) and *Clupea harengus* L. (Actinopterygii, Clupeidae) (Rahimian et al.,  
94 1999) in the North Sea. In comparison to monogeneans infecting clupeid fishes in Lake  
95 Tanganyika, no host size related infection intensity was observed in the case of *Mazocraes*  
96 *alosa* Hermann, 1782 on two species of *Alosa* Linck, 1790 (Actinopterygii, Clupeidae) from  
97 North-Atlantic coastal waters (Gérard et al., 2017). Host behaviour and season were shown  
98 to drive temporal differences in infection levels of *M. alosa* on *Alosa immaculata* Bennett,  
99 1835 in the northern Black and Azov Seas (Plaksina et al., 2021).

100 A holistic approach for stock identification has been highlighted before (Begg and Waldman,  
101 1999). The combination of parasite community data and host morphometric data aided in the  
102 discovery of multiple stocks of horse mackerel (*Trachurus trachurus* L.) in the North Atlantic  
103 (Abaunza et al., 2008) and in the stock identification of Australian sardines (*Sardinops sagax*  
104 (Jenyns, 1842)) along the East African coast (Van Der Lingen et al., 2015). Unlike parasites  
105 with complex life cycles, directly transmitted parasites have the advantage that distribution is

106 limited to the target host enabling elucidation of large-scale and long-term population  
107 dynamics of certain host-parasite interaction (Catalano et al., 2014). Using a  
108 geomorphometric approach, we found intraspecific morphological differences in the LT  
109 clupeid species linked to the geographic origin of the specimens especially in *L. miodon*.  
110 Morphological variation can be driven by various environmental factors (Mounir et al., 2019;  
111 Sultan & Stearns, 2005). In our study, the level of geographically determined morphological  
112 variation differed between the studied fish species. The shape differences in the relative  
113 position of snout and eyes may be related to the geographical distance and more concretely  
114 subbasin origin of *L. miodon*. The environment in the middle part of the lake could serve as a  
115 transit site between the northern and southern parts. Moreover, compared to other areas,  
116 the northern peak can be seen as the most affected by anthropogenic pressures (Cohen et  
117 al., 2005). Morphological variation of the head was also visible in *S. tanganyicae*, but without  
118 a clear geographical pattern. These results indicate a more profound shape differentiation in  
119 *L. miodon* compared to *S. tanganyicae*, despite originating from the same localities. The  
120 absence of clearly geographically determined morphological differences in *S. tanganyicae*  
121 can be explained by the lack of residential behaviour. Although the results indicate that the  
122 population of *L. miodon* is more structured compared to *S. tanganyicae*, the lack of a clear  
123 geographic cline supports the high level of population connectivity of this species across the  
124 lake (Junker et al., 2020). As hypothesised, given the host life-stage dependency of *K.*  
125 *limnotrissae*, contrasting infection levels related to geographic origin suggest that the spatial  
126 distribution of the parasites and the morphological response of the clupeid hosts follow  
127 similar geographic patterns. Overall, our results on lake-wide parasite occurrence and  
128 seasonal dynamics combined with characterisation of clupeid hosts support the hypothesis  
129 of largely unrestricted migration in *S. tanganyicae* and the lack of barriers in the pelagic zone  
130 of the lake (De Keyzer et al., 2019; Junker et al., 2020; Mulimbwa N'Sibula et al., 2022).  
131 Habitat differences between the clupeid hosts over their lifespan most likely drive contrasting  
132 spatial patterns of infection between closely related parasite species. This result further  
133 supports the importance of host species with the highest dispersal capacity on the spatial

134 distribution of parasites, as reported for *Cichlidogyrus casuarinus* Pariselle, Muterezi  
135 Bukinga & Vanhove, 2015 infecting pelagic cichlids in the lake (Kmentová et al., 2021).  
136 Contrasting levels of gene flow between the two parasite species related to geographic  
137 origin along the North-South axis of the lake (Kmentová et al., Under review) may therefore  
138 be associated with lifestyle differences between the two clupeid species.

139 *Host size and life-stage dependent habitat preference drive parasite occurrence*

140 The diurnal and geographically small-scale migrations of Tanganyika clupeids are generally  
141 better understood than the long term patterns. Vertically, these clupeids respond to light and  
142 oxygen concentration and follow the diurnal movements of their prey. Horizontally, they  
143 migrate between the offshore waters of the pelagic and the inshore waters of the littoral  
144 habitat throughout their development (Matthes 1967). A recent long-term study of the  
145 reproductive activities of the clupeids in the northern subbasin identified the littoral zone as  
146 the main spawning ground for *L. miodon*, and the pelagic zone as the equivalent for *S.*  
147 *tanganicae* (Mulimbwa N'sibula et al., 2022). Juveniles of both species occur in littoral  
148 habitats, but in general *S. tanganicae* lives and spawns at greater distances from the shore  
149 than *L. miodon* (Coulter, 1970, 1991b; Mannini et al., 1996). Eggs of *L. miodon* can even be  
150 deposited just above the sandy bottom of the littoral zone. Juveniles of *L. miodon*, but not *S.*  
151 *tanganicae*, occupy sandy beaches right by the shore (Mulimbwa N'Sibula et al., 2022).

152 In line with our hypothesis, the body size of the clupeid hosts appears to be a major  
153 determinant of infection, as it significantly affects infection intensities for all three host-  
154 parasite combinations. Such an overall positive correlation between fish size and  
155 monogenean infection intensities has been associated with a larger habitat offered by larger  
156 hosts (Alvarez-Pellitero & Gonzalez-Lanza, 1982; Poulin, 2000). Considering the age-  
157 dependent migration of *L. miodon* from the littoral to the pelagic zone, the contrasting  
158 infection intensities associated with host size between *K. limnotrissae* and *K. tanganicanus*  
159 suggests a spatial stratification of infection linked with the ontogenetic migration of *L. miodon*

160 from the littoral to the pelagic zone. This apparent replacement contrasts with the positive  
161 effect of each parasite species' infection intensity on that of the other species. We suggest a  
162 combination of changes in host habitat and facilitation of infection caused by host immune  
163 deficiency or suppression at the base of this pattern. Suppression of the fish immune system  
164 allowing higher infection intensities has been shown in previous studies on monogeneans  
165 (Rohlenová et al., 2011; Sitjà-Bobadilla, 2008) and other parasite taxa (Klemme et al., 2016).  
166 Alternatively, the antagonistic interaction between the two parasite species could explain the  
167 resulting pattern, as proposed e.g., in the monogenean communities infecting *Astyanax*  
168 *aeneus* (Günther, 1860) in Neotropical rivers in Mexico (Salgado-Maldonado et al., 2019).  
169 However, so far there is no evidence of negative or any direct interspecific monogenean  
170 interaction between closely related species (Šimková et al., 2000; Soler-Jiménez & Fajer-  
171 Ávila, 2012).

## 172 *Conclusion*

173 Lake Tanganyika is an ancient and pristine lake known for a spectacular level of species  
174 diversity and endemism. The existence of schooling pelagic fishes in an enclosed ecosystem  
175 promotes studies on general ecosystem dynamics of pelagic areas. The link between  
176 theoretical/experimental studies and dynamics in natural ecosystems is largely unknown  
177 (Lindegren et al., 2016) and a common framework is lacking (Ritz et al., 2011). Incorporation  
178 of host-parasite interactions increases our knowledge on the interconnectedness of trophic  
179 levels (Lafferty et al., 2006). Our holistic approach based on spatiotemporal distribution of  
180 fish parasites and morphological variation of the host species reveals insights on the  
181 ecosystem dynamics along a North-South axis, and habitat preferences of two important  
182 fisheries targets. As restricted migration of *L. miodon* is considered as one of the drivers of  
183 profound North-South differences in parasite occurrence and fish morphology, being also  
184 indicated in recent studies (De Keyzer et al., 2019; Junker et al., 2020), such results should  
185 be considered in fisheries management plans. Our results suggest that parasite population  
186 dynamics in pelagic zones are dependent on spatial distribution of the hosts in both large



187 and small scales. Intensity of infection seems to be mainly driven by fish size with mutual  
188 facilitation in case of co-infection. Lack of seasonality in infection intensity points to  
189 environmental stability of the pelagic zone and absence of density dependent infection.

## 190 **Acknowledgements**

191 We would like to thank Stephan Koblmüller, Holger Zimmermann, Jiří Vorel, Simona  
192 Georgieva, Cyprian Katongo, Taylor Banda, Aneesh P.H. Bose, Filip A.M. Volckaert and Els  
193 De Keyzer for their help in organising and conducting field work. Pierre-Denis Plisnier is  
194 acknowledged for providing bathymetric data of Lake Tanganyika. The study was supported  
195 by the Czech Science Foundation (GACR) project no. P505/12/G112—European Centre of  
196 Ichtyoparasitology (ECIP) and standard project GA19-13573S, research grant 1513419N of  
197 the Research Foundation—Flanders (FWO-Vlaanderen). AJCL (BOF19OWB02), NK  
198 (BOF21PD01) and MPMV (BOF20TT06) received support from the Special Research Fund  
199 of Hasselt University.

## 200 **Conflict of Interest**

201 Authors declare no conflict of interest.

## 202 **Author Contributions**

203 N.K. designed the study, generated incidence data, analysed geometric morphometric data  
204 and drafted the manuscript. A.C-L. analysed incidence data and helped draft the manuscript,  
205 M.J. generated part of the incidence data and helped to draft the manuscript, M.V.S.  
206 supervised geometric morphometric data analyses and interpretation of results, M.P.M.V.  
207 discussed the results, helped draft the manuscript and supervised the study, T.M. and  
208 E.V.H. helped with geometric morphometric data analyses, S.H. generated geometric  
209 morphometric data, L.Mi. and K.T. helped with data interpretation and draft of the  
210 manuscript, L.Ma. provided support in the field and knowledge on the studied ecosystem. All  
211 authors have read and agreed to the published version of the manuscript.

## 212 **Data Availability Statement**

213 Parasite voucher material was deposited in the collection of Hasselt University under  
214 accession numbers xx-xx and the Royal Museum for Central Africa. The geometric  
215 morphometric data underlying the results of this article are available in Mendeley Data (xxx).

## 216 **Supporting Information**

217 Additional supporting information may be found in the online version of the article at the  
218 publisher's website.

## 219 **References**

- 220 Abaunza, P., Murta, A. G., Campbell, N., Cimmaruta, R., Comesaña, A. S., Dahle, G., ...  
221 Zimmermann, C. (2008). Stock identity of horse mackerel (*Trachurus trachurus*) in the  
222 Northeast Atlantic and Mediterranean Sea: Integrating the results from different stock  
223 identification approaches. *Fisheries Research*, 89, 196–209.  
224 <https://doi.org/10.1016/J.FISHRES.2007.09.022>
- 225 Akoll, P., Konečný, R., Mwanja, W. W., & Schiemer, F. (2012). Risk assessment of parasitic  
226 helminths on cultured Nile tilapia (*Oreochromis niloticus*, L.). *Aquaculture*, 356, 123–  
227 127. <https://doi.org/10.1016/j.aquaculture.2012.05.027>
- 228 Alvarez-Pellitero, M. P., & Gonzalez-Lanza, M. C. (1982). Description and population  
229 dynamics of *Dactylogyrus legionensis* n. sp. from *Barbus barbus bocagei* Steind.  
230 *Journal of Helminthology*, 56(3), 263–273. <https://doi.org/10.1017/S0022149X00034647>
- 231 Angel, M. V. (1993). Biodiversity of the pelagic ocean. *Conservation Biology*, 7, 760–772.  
232 <https://doi.org/10.1046/j.1523-1739.1993.740760.x>
- 233 Baltazar-Soares, M., Hinrichsen, H. H., & Eizaguirre, C. (2018). Integrating population  
234 genomics and biophysical models towards evolutionary-based fisheries management.  
235 *ICES Journal of Marine Science*, 75, 1245–1257.  
236 <https://doi.org/10.1093/ICESJMS/FSX244>
- 237 Blackburn, T. M., Pyšek, P., Bacher, S., Carlton, J. T., Duncan, R. P., Jarošík, V., ...

- 238 Richardson, D. M. (2011). A proposed unified framework for biological invasions.  
239 *Trends in Ecology and Evolution*, 26, 333–339.  
240 <https://doi.org/10.1016/j.tree.2011.03.023>
- 241 Bolker, B. (2017). *Package 'bbmle'.* *Tools for General Maximum Likelihood Estimation*.
- 242 Brooks, M. E. ;, Kristensen, K. ;, Van Benthem, K. J. ;, Magnusson, A. ;, Berg, C. W. ;,  
243 Nielsen, A. ;, ... Mächler, M. (2017). glmmTMB balances speed and flexibility among  
244 packages for zero-inflated generalized linear mixed modeling. *The R Journal*, 9, 378–  
245 400. <https://doi.org/10.3929/ETHZ-B-000240890>
- 246 Catalano, S. R., Whittington, I. D., Donnellan, S. C., & Gillanders, B. M. (2014). Parasites as  
247 biological tags to assess host population structure: Guidelines, recent genetic advances  
248 and comments on a holistic approach. *International Journal for Parasitology: Parasites  
249 and Wildlife*, 3, 220–226. <https://doi.org/10.1016/j.ijppaw.2013.11.001>
- 250 Cohen, A. S., Palacios-Fest, M. R., Msaky, E. S., Alin, S. R., McKee, B., O'Reilly, C. M., ...  
251 Lezzar, K. E. (2005). Paleolimnological investigations of anthropogenic environmental  
252 change in Lake Tanganyika: IX. Summary of paleorecords of environmental change  
253 and catchment deforestation at Lake Tanganyika and impacts on the Lake Tanganyika  
254 ecosystem. *Journal of Paleolimnology* 34, 125–145. [https://doi.org/10.1007/S10933-  
255 005-2422-4](https://doi.org/10.1007/S10933-005-2422-4)
- 256 Corman, J. R., McIntyre, P. B., Kuboja, B., Mbemba, W., Fink, D., Wheeler, C. W., ...  
257 Flecker, A. S. (2010). Upwelling couples chemical and biological dynamics across the  
258 littoral and pelagic zones of Lake Tanganyika, East Africa. *Limnology and  
259 Oceanography*, 55, 214–224. <https://doi.org/10.4319/LO.2010.55.1.0214>
- 260 Coulter, G. W. (1970). Population changes within a group of fish species in Lake Tanganyika  
261 following their exploitation. *Journal of Fish Biology*, 2, 329–353.  
262 <https://doi.org/10.1111/j.1095-8649.1970.tb03292.x>
- 263 Coulter, G. W. (1991a). Introduction. In G. W. Coulter (Ed.), *Lake Tanganyika and Its Life*  
264 (pp. 1–6). London Oxford & New York: Natural History Museum Publications & Oxford  
265 University Press.

- 266 Coulter, G. W. (1991b). Pelagic Fish. In G. W. Coulter (Ed.), *Lake Tanganyika and Its Life*  
267 (pp. 111–150). London Oxford & New York: Natural History Museum & Oxford University  
268 Press.
- 269 Cristescu, M. E., Adamowicz, S. J., Vaillant, J. J., & Haffner, D. G. (2010). Ancient lakes  
270 revisited: from the ecology to the genetics of speciation. *Molecular Ecology*, *19*, 4837–  
271 4851. <https://doi.org/10.1111/J.1365-294X.2010.04832.X>
- 272 De Keyzer, E. L. R., De Corte, Z., Van Steenberge, M., Raeymaekers, J. A. M., Calboli, F. C.  
273 F., Kmentová, N., ... Vanhove, M. P. M. (2019). First genomic study on Lake  
274 Tanganyika sprat *Stolothrissa tanganyicae*: A lack of population structure calls for  
275 integrated management of this important fisheries target species. *BMC Evolutionary*  
276 *Biology*, *19*, 6. <https://doi.org/10.1186/s12862-018-1325-8>
- 277 De La Cruz Agüero, J., & Rodríguez, F. J. G. (2004). Morphometric stock structure of the  
278 Pacific sardine *Sardinops sagax* (Jenyns, 1842) off Baja California, Mexico. In A. M. T.  
279 Elewa (Ed.), *Morphometrics: Applications in Biology and Paleontology* (pp. 115–127).  
280 [https://doi.org/10.1007/978-3-662-08865-4\\_9](https://doi.org/10.1007/978-3-662-08865-4_9)
- 281 Elewa, A. (2004). *Morphometrics: applications in biology and paleontology. Vol.14*. Springer  
282 Science & Business Media.
- 283 Geraerts, M., Huyse, T., Barson, M., Bassirou, H., Bilong Bilong, C. F., Bitja Nyom, A. R., ...  
284 Vanhove, M. P. M. (2022). Mosaic or melting pot: The use of monogeneans as a  
285 biological tag and magnifying glass to discriminate introduced populations of Nile tilapia  
286 in sub-Saharan Africa. *Genomics*, *114*, 110328.  
287 <https://doi.org/10.1016/J.YGENO.2022.110328>
- 288 Gérard, C., Hervé, M., Gay, M., Bourgau, O., Feunteun, E., Acou, A., & Réveillac, E. (2017).  
289 Metazoan parasite communities in *Alosa alosa* (Linnaeus, 1758) and *Alosa fallax*  
290 (Lacépède, 1803) (Clupeidae) from North-East Atlantic coastal waters and connected  
291 rivers. *Parasitology Research*, *116*, 2211–2230. [https://doi.org/10.1007/S00436-017-](https://doi.org/10.1007/S00436-017-5525-8/TABLES/12)  
292 [5525-8/TABLES/12](https://doi.org/10.1007/S00436-017-5525-8/TABLES/12)
- 293 Hardin, J. W., & Hilbe, J. M. (2007). *Generalized linear models and extensions*. Stata press.

- 294 Hartig, F. (2017). *DHARMA: Residual Diagnostics for Hierarchical (Multi-Level/Mixed)*  
295 *Regression Models. R package version 0.4.5.*
- 296 Hatcher, M. J., Dick, J. T. A., & Dunn, A. M. (2012). Disease emergence and invasions.  
297 *Functional Ecology*, 26, 1275–1287. <https://doi.org/10.1111/j.1365-2435.2012.02031.x>
- 298 Javor, B., Lo, N., & Vetter, R. (2011). Otolith morphometrics and population structure of  
299 Pacific Sardine (*Sardinops sagax*) along the west coast of North America. *Fishery*  
300 *Bulletin*, 109, 402–415.
- 301 Junker, J., Rick, J. A., McIntyre, P. B., Kimirei, I., Sweke, E. A., Mosille, J. B., ... Wagner, C.  
302 E. (2020). Structural genomic variation leads to genetic differentiation in Lake  
303 Tanganyika's sardines. *Molecular Ecology*, 29, 3277–3298.  
304 <https://doi.org/10.1111/MEC.15559>
- 305 Kerr, L. A., Hintzen, N. T., Cadrin, S. X., Clausen, L. W., Dickey-Collas, M., Goethel, D. R.,  
306 ... Nash, R. D. M. (2017). Lessons learned from practical approaches to reconcile  
307 mismatches between biological population structure and stock units of marine fish.  
308 *ICES Journal of Marine Science*, 74, 1708–1722.  
309 <https://doi.org/10.1093/ICESJMS/FSW188>
- 310 Kimirei, I., & Mgaya, Y. (2007). Influence of environmental factors on seasonal changes in  
311 clupeid catches in the Kigoma area of Lake Tanganyika. *African Journal of Aquatic*  
312 *Science*, 32, 291–298. <https://doi.org/10.2989/AJAS.2007.32.3.9.308>
- 313 Kleinertz, S., Klimpel, S., & Palm, H. W. (2012). Parasite communities and feeding ecology  
314 of the European sprat (*Sprattus sprattus* L.) over its range of distribution. *Parasitology*  
315 *Research*, 110, 1147–1157. <https://doi.org/10.1007/S00436-011-2605-Z/TABLES/3>
- 316 Klemme, I., Louhi, K. R., & Karvonen, A. (2016). Host infection history modifies co-infection  
317 success of multiple parasite genotypes. *Journal of Animal Ecology*, 85, 591–597.  
318 <https://doi.org/10.1111/1365-2656.12472>
- 319 Klingenberg, C. P. (2011). MorphoJ: an integrated software package for geometric  
320 morphometrics. *Molecular Ecology Resources*, 11, 353–357.  
321 <https://doi.org/10.1111/j.1755-0998.2010.02924.x>

- 322 Kmentová, N., Van Steenberge, M., Raeymaekers, J. A. R., Koblmüller, S., Hablützel, P. I.,  
323 Muterezi Bukinga, F., ... Vanhove, M. P. M. (2018). Monogenean parasites of sardines  
324 in Lake Tanganyika: Diversity, origin and intra-specific variability. *Contributions to*  
325 *Zoology*, *87*, 105–132.
- 326 Kmentová, N., Van Steenberge, M., Thys van den Audenaerde, D. F. E., Nhiwatiwa, T.,  
327 Muterezi Bukinga, F., Mulimbwa N'sibula, T., ... Vanhove, M. P. M. (2019). Co-  
328 introduction success of monogeneans infecting the fisheries target *Limnothrissa miodon*  
329 differs between two non-native areas: The potential of parasites as a tag for introduction  
330 pathway. *Biological Invasions*, *21*, 757–773. <https://doi.org/10.1007/s10530-018-1856-3>
- 331 Kmentová, N., Koblmüller, S., Van Steenberge, M., Raeymaekers, J. A. M., Artois, T., De  
332 Keyzer, E. L. R., ... Vanhove, M. P. M. (2020). Weak population structure and recent  
333 demographic expansion of the monogenean parasite *Kapentagyryus* spp. infecting  
334 clupeid fishes of Lake Tanganyika, East Africa. *International Journal for Parasitology*,  
335 *50*, 471–486. <https://doi.org/10.1016/j.ijpara.2020.02.002>
- 336 Kmentová, N., Hahn, C., Koblmüller, S., Zimmermann, H., Vorel, J., Artois, T., ... Vanhove,  
337 M. P. M. (2021). Contrasting host-parasite population structure: Morphology and  
338 mitogenomics of a parasitic flatworm on pelagic deepwater cichlid fishes from Lake  
339 Tanganyika. *Biology*, *10*, 797. <https://doi.org/10.3390/biology10080797>
- 340 Kmentová, N., Thys, K., Hahn, C., Vorel, J., Koblmüller, S., Chocha Manda, A., Makasa, L.,  
341 ... Vanhove, M. P. M. Comparative population mitogenomics of fish parasites reveals  
342 contrasting geographic pattern in the pelagic zone of Lake Tanganyika. Under review in  
343 *Molecular Ecology*; preprint available on *Authorea*.  
344 <https://doi.org/10.22541/au.167274604.41657501/v1>.
- 345 Kuris, A. M., Hechinger, R. F., Shaw, J. C., Whitney, K. L., Aguirre-Macedo, L., Boch, C. A.,  
346 ... Lafferty, K. D. (2008). Ecosystem energetic implications of parasite and free-living  
347 biomass in three estuaries. *Nature*, *454*, 515–518. <https://doi.org/10.1038/nature06970>
- 348 Lafferty, K. D., Dobson, A. P., & Kuris, A. M. (2006). Parasites dominate food web links.  
349 *Proceedings of the National Academy of Sciences*, *103*, 11211–11216.

- 350 <https://doi.org/10.1073/PNAS.0604755103>
- 351 Lavoué, S., Sullivan, J. P., Arnegard, M. E., & Hopkins, C. D. (2008). Differentiation of  
352 morphology, genetics and electric signals in a region of sympatry between sister  
353 species of African electric fish (Mormyridae). *Journal of Evolutionary Biology*, 21, 1030–  
354 1045. <https://doi.org/10.1111/J.1420-9101.2008.01544.X>
- 355 Lefèvre, T., Lebarbenchon, C., Gauthier-Clerc, M., Missé, D., Poulin, R., & Thomas, F.  
356 (2009). The ecological significance of manipulative parasites. *Trends in Ecology &*  
357 *Evolution*, 24, 41–48. <https://doi.org/10.1016/J.TREE.2008.08.007>
- 358 Legendre, L., & Le Fèvre, J. (1991). From individual plankton cells to pelagic marine  
359 ecosystems and to global biogeochemical cycles. *Particle Analysis in Oceanography*,  
360 261–300. [https://doi.org/10.1007/978-3-642-75121-9\\_11](https://doi.org/10.1007/978-3-642-75121-9_11)
- 361 Lenth, R. V. (2022). *emmeans: Estimated Marginal Means, aka Least-Squares Means. R*  
362 *package version 1.7.5*.
- 363 Lester, R. J. G. (2012). Overdispersion in marine fish parasites. *Journal of Parasitology*, 98,  
364 718–721. <https://doi.org/10.1645/GE-3017.1>
- 365 Lester, R. J. G., & MacKenzie, K. (2009). The use and abuse of parasites as stock markers  
366 for fish. *Fisheries Research*, 97, 1–2. <https://doi.org/10.1016/J.FISHRES.2008.12.016>
- 367 Lindegren, M., Checkley, D. M., Ohman, M. D., Koslow, J. A., & Goericke, R. (2016).  
368 Resilience and stability of a pelagic marine ecosystem. *Proceedings of the Royal*  
369 *Society B: Biological Sciences*, 283, 20151931.  
370 <https://doi.org/10.1098/RSPB.2015.1931>
- 371 MacKenzie, K., & Abaunza, P. (2014). Parasites as Biological Tags. *Stock Identification*  
372 *Methods: Applications in Fishery Science: Second Edition*, 185–203.  
373 <https://doi.org/10.1016/B978-0-12-397003-9.00010-2>
- 374 Mannini, P., Aro, E., Katonda, K. I., Kassaka, B., Mambona, C., Milindi, G., ... Verburg, P.  
375 (1996). Pelagic fish stocks of Lake Tanganyika: Biology and exploitation. FAO/FINNIDA  
376 research for the management of the fisheries of Lake Tanganyika. In  
377 *GCP/RAF/271/FIN—TD/53 (En)*. Bujumbura.

- 378 Marcogliese, D. J. (2002). Food webs and the transmission of parasites to marine fish.  
379 *Parasitology*, 124, 83–99. <https://doi.org/10.1017/S003118200200149X>
- 380 Mölsä, H., Reynolds, J. E., Coenen, E. J., & Lindqvist, O. V. (1999). Fisheries research  
381 towards resource management on Lake Tanganyika. *Hydrobiologia*, 407, 1–24.  
382 <https://doi.org/10.1023/A:1003712708969>
- 383 Mounir, A., Ewague, A., Znari, M., & Elmghazli, H. (2019). Discrimination of the phenotypic  
384 sardine *Sardina pilchardus* stocks off the Moroccan Atlantic coast using a morphometric  
385 analysis. <https://doi.org/10.2989/1814232X.2019.1597765>, 41, 137–144.  
386 <https://doi.org/10.2989/1814232X.2019.1597765>
- 387 Mulimbwa N’Sibula, T., & Mannini, P. (1993). Demographic characteristics of *Stolothrissa*  
388 *tanganicae*, *Limnothrissa miodon* and *Lates stappersii* in the Northwestern (Zairean)  
389 waters of Lake Tanganyika. *CIFA Occasional Paper (FAO)*. Retrieved from  
390 <http://agris.fao.org/agris-search/search.do?recordID=XF9543811>
- 391 Mulimbwa N’Sibula, T., Milec, L. J. M., Raeymaekers, J. A. M., Sarvala, J., Plisnier, P. D.,  
392 Marwa, B., & Micha, J. C. (2022). Spatial and seasonal variation in reproductive indices  
393 of the clupeids *Limnothrissa miodon* and *Stolothrissa tanganicae* in the Congolese  
394 waters of northern Lake Tanganyika. *Belgian Journal of Zoology*, 152, 13–31.  
395 <https://doi.org/10.26496/BJZ.2022.96>
- 396 Muniz, A. A., Moura, A., Triay-Portella, R., Moreira, C., Santos, P. T., & Correia, A. T.  
397 (2020). Population structure of the chub mackerel (*Scomber colias*) in the North-east  
398 Atlantic inferred from otolith shape and body morphometrics. *Marine and Freshwater*  
399 *Research*, 72, 341–352. <https://doi.org/10.1071/MF19389>
- 400 Neuwirt, E. (2022). *RColorBrewer: ColorBrewer Palettes. R package version 1.1-3*.
- 401 Paugy, D., & Lévêque, C. (2017). Diets and food webs. In D. Paugy, C. Lévêque, & O. Otero  
402 (Eds.), *The inland water fishes of Africa: Diversity, ecology and human use* (pp. 233–  
403 257).
- 404 Pauly, D., Christensen, V., Guénette, S., Pitcher, T. J., Sumaila, U. R., Walters, C. J., ...  
405 Zeller, D. (2002). Towards sustainability in world fisheries. *Nature*, 418(6898), 689–695.



- 406 <https://doi.org/10.1038/NATURE01017>
- 407 Plaksina, M. P., Gibson, D. I., & Dmitrieva, E. V. (2021). Life-history studies on  
408 infrapopulations of *Mazocraes alosae* (Monogenea) parasitising *Alosa immaculata*  
409 (Actinopterygii) in the northern Black and Azov Seas.  
410 [Http://Folia.Paru.Cas.Cz/Doi/10.14411/Fp.2021.009.Html](http://Folia.Paru.Cas.Cz/Doi/10.14411/Fp.2021.009.Html), 68, 1–10.  
411 <https://doi.org/10.14411/FP.2021.009>
- 412 Plisnier, P. D., Mgana, H., Kimirei, I., Chande, A., Makasa, L., Chimanga, J., ... Cornet, Y.  
413 (2009). Limnological variability and pelagic fish abundance (*Stolothrissa tanganyicae* and  
414 *Lates stappersii*) in Lake Tanganyika. *Hydrobiologia*, 625, 117–134.  
415 <https://doi.org/10.1007/s10750-009-9701-4>
- 416 Poulin, R. (2000). Variation in the intraspecific relationship between fish length and intensity  
417 of parasitic infection: Biological and statistical causes. *Journal of Fish Biology*, 56, 123–  
418 137. <https://doi.org/10.1006/jfbi.1999.1146>
- 419 Poulin, R. (2007). *Evolutionary ecology of parasites. 2nd ed.* Princeton University Press,  
420 New Jersey, USA.
- 421 Poulin, R. (2014). Parasite biodiversity revisited: Frontiers and constraints. *International*  
422 *Journal for Parasitology*, 44, 581–589. <https://doi.org/10.1016/J.IJPARA.2014.02.003>
- 423 R Core Team (2022). R: A language and environment for statistical computing. Foundation  
424 for Statistical Computing, Vienna, Austria. URL <https://www.R-project.org/>.
- 425 Rahimian, H., Longshaw, M., MacKenzie, K., & Thulin, J. (1999). *Pseudanthocotyloides*  
426 *heterocotyle* (van Beneden, 1871) Euzet & Prost, 1969 (Monogenea:  
427 Polyopisthocotylea: Mazocraeidae), a parasite of herring *Clupea harengus* L. and sprat  
428 *Sprattus sprattus* L. (Teleostei: Clupeidae). *Systematic Parasitology*, 42, 193–201.  
429 <https://doi.org/10.1023/A:1006042302301>
- 430 Ritz, D. A., Hobday, A. J., Montgomery, J. C., & Ward, A. J. W. (2011). Social aggregation in  
431 the pelagic zone with special reference to fish and invertebrates. *Advances in Marine*  
432 *Biology*, 60, 161–227. <https://doi.org/10.1016/B978-0-12-385529-9.00004-4>
- 433 Rohlenová, K., Morand, S., Hyršl, P., Tolarová, S., Flajšhans, M., & Šimková, A. (2011). Are

- 434 fish immune systems really affected by parasites? An immunoecological study of  
435 common carp (*Cyprinus carpio*). *Parasites & Vectors*, 4, 120.  
436 <https://doi.org/10.1186/1756-3305-4-120>
- 437 Salgado-Maldonado, G., Mendoza-Franco, E. F., Caspeta-Mandujano, J. M., & Ramírez-  
438 Martínez, C. (2019). Aggregation and negative interactions in low-diversity and  
439 unsaturated monogenean (Platyhelminthes) communities in *Astyanax aeneus*  
440 (Teleostei) populations in a neotropical river of Mexico. *International Journal for*  
441 *Parasitology: Parasites and Wildlife*, 8, 203–215.  
442 <https://doi.org/10.1016/j.ijppaw.2019.02.005>
- 443 Savriama, Y. (2018). A Step-by-step guide for geometric morphometrics of floral symmetry.  
444 *Frontiers in Plant Science*, 9, 1433. <https://doi.org/10.3389/FPLS.2018.01433/BIBTEX>
- 445 Schoeman, A. L., du Preez, L. H., Kmentová, N., & Vanhove, M. P. M. (2022). A  
446 monogenean parasite reveals the widespread translocation of the African clawed frog in  
447 its native range. *Journal of Applied Ecology*, 59, 2670–2687.  
448 <https://doi.org/10.1111/1365-2664.14271>
- 449 Silva, A. (2003). Morphometric variation among sardine (*Sardina pilchardus*) populations  
450 from the northeastern Atlantic and the western Mediterranean. *ICES Journal of Marine*  
451 *Science*, 60, 1352–1360. [https://doi.org/10.1016/S1054-3139\(03\)00141-3](https://doi.org/10.1016/S1054-3139(03)00141-3)
- 452 Šimková, A., Desdevises, Y., Gelnar, M., & Morand, S. (2000). Co-existence of nine gill  
453 ectoparasites (*Dactylogyrus*: Monogenea) parasitising the roach (*Rutilus rutilus* L.):  
454 History and present ecology. *International Journal for Parasitology*, 30, 1077–1088.  
455 [https://doi.org/10.1016/S0020-7519\(00\)00098-9](https://doi.org/10.1016/S0020-7519(00)00098-9)
- 456 Šimková, A., Morand, S., Jobet, E., Gelnar, M., & Verneau, O. (2004). Molecular phylogeny  
457 of congeneric monogenean parasites (*Dactylogyrus*): A case of intrahost speciation.  
458 *Evolution; International Journal of Organic Evolution*, 58, 1001–1018.  
459 <https://doi.org/10.1111/j.0014-3820.2004.tb00434.x>
- 460 Sitjà-Bobadilla, A. (2008). Living off a fish: A trade-off between parasites and the immune  
461 system. *Fish & Shellfish Immunology*, 25, 358–372.

- 462 <https://doi.org/10.1016/J.FSI.2008.03.018>
- 463 Soler-Jiménez, L. C., & Fajer-Ávila, E. J. (2012). The microecology of dactylogyrids  
464 (Monogenea: Dactylogyridae) on the gills of wild spotted rose snapper *Lutjanus guttatus*  
465 (Lutjanidae) from Mazatlan Bay, Mexico. *Folia Parasitologica*, 59, 53–58.  
466 <https://doi.org/10.14411/fp.2012.008>
- 467 Sultan, S. E., & Stearns, S. C. (2005). Environmentally contingent variation: Phenotypic  
468 plasticity and norms of reaction. *Variation*, 303–332. [https://doi.org/10.1016/B978-](https://doi.org/10.1016/B978-012088777-4/50016-8)  
469 [012088777-4/50016-8](https://doi.org/10.1016/B978-012088777-4/50016-8)
- 470 Teske, P. R., Emami-Khoyi, A., Golla, T. R., Sandoval-Castillo, J., Lamont, T., Chiazzari, B.,  
471 ... van der Lingen, C. D. (2021). The sardine run in southeastern Africa is a mass  
472 migration into an ecological trap. *Science Advances*, 7, eabf4514.  
473 <https://doi.org/10.1126/sciadv.abf4514>
- 474 Timi, J. T., & Poulin, R. (2003). Parasite community structure within and across host  
475 populations of a marine pelagic fish: How repeatable is it? *International Journal for*  
476 *Parasitology*, 33, 1353–1362. [https://doi.org/10.1016/S0020-7519\(03\)00203-0](https://doi.org/10.1016/S0020-7519(03)00203-0)
- 477 Tinsley, R. C., Rose Vineer, H., Grainger-Wood, R., & Morgan, E. R. (2020). Heterogeneity  
478 in helminth infections: Factors influencing aggregation in a simple host-parasite system.  
479 *Parasitology*, 147, 65–77. <https://doi.org/10.1017/S003118201900129X>
- 480 Tomnatik, V. E. (1990). The influence of water temperature on the sexual maturation of  
481 *Dactylogyrus vastator*. *Parazitologiya*, 24, 235–238.
- 482 Valentin, A. E., Penin, X., Chanut, J. P., Power, D., & Sévigny, J. M. (2014). Combining  
483 microsatellites and geometric morphometrics for the study of redfish (*Sebastes* spp.)  
484 population structure in the Northwest Atlantic. *Fisheries Research*, 154, 102–119.  
485 <https://doi.org/10.1016/J.FISHRES.2014.02.008>
- 486 Van Der Lingen, C. D., Weston, L. F., Ssempe, N. N., & Reed, C. C. (2015). Incorporating  
487 parasite data in population structure studies of South African sardine *Sardinops sagax*.  
488 *Parasitology*, 142, 156–167. <https://doi.org/10.1017/S0031182014000018>
- 489 Vanhove, M. P. M., Hermans, R., Artois, T., & Kmentová, N. (2021). From the Atlantic coast

490 to Lake Tanganyika: Gill-infecting flatworms of freshwater pellonuline clupeid fishes in  
491 West and Central Africa, with description of eleven new species and key to  
492 *Kapentagyris* (Monogenea, Dactylogyridae). *Animals*, 11, 3578.  
493 <https://doi.org/10.3390/ANI11123578/S1>

494 Wang, C., Torgerson, P. R., Höglund, J., & Furrer, R. (2017). Zero-inflated hierarchical  
495 models for faecal egg counts to assess anthelmintic efficacy. *Veterinary Parasitology*,  
496 235, 20–28. <https://doi.org/10.1016/J.VETPAR.2016.12.007>

497 Wickham, H. (2016). *ggplot2: Elegant Graphics for Data Analysis*. New York: Springer-  
498 Verlag.

499 Wickham, H., Averick, M., Bryan, J., Chang, W., McGowan, L., François, R., ... Yutani, H.  
500 (2019). Welcome to the Tidyverse. *Journal of Open Source Software*, 4, 1686.  
501 <https://doi.org/10.21105/joss.01686>

502 Wilke, C. (2020). *ggtext: Improved Text Rendering Support for “ggplot2”*. *R package version*  
503 *0.1.1*.

504 Windsor, D. A. (1998). Controversies in parasitology, most of the species on Earth are  
505 parasites. *Int J Parasitol*, 28, 1939-1941. [https://doi.org/10.1016/S0020-7519\(98\)00153-](https://doi.org/10.1016/S0020-7519(98)00153-2)  
506 *2*

507 Zuur, A. F., Ieno, E. N., Walker, N. J., Saveliev, A. A., & Smith, G. M. (2009). *Zero-Truncated*  
508 *and Zero-Inflated Models for Count Data*. In *Mixed effects models and extensions in*  
509 *ecology with R*. *Statistics for Biology and Health* (pp. 261-293).  
510 [https://doi.org/10.1007/978-0-387-87458-6\\_11](https://doi.org/10.1007/978-0-387-87458-6_11)  
511
